# Supplementary material for: Practice patterns and trends in surgical treatment for chronic lung infections: a survey from the Brazilian Society of Thoracic Surgery
Source: PubMed Central journal article supplement — J Thorac Dis. 2023 Jul 31;15(8):4285–91. doi: 10.21037/jtd-23-111 (PMC10482616; doi:10.21037/jtd-23-111), 2023-07-31
Supplement: jtd-15-08-4285-supplementary.pdf [file jtd-15-08-4285-supplementary.pdf]

**Portuguese version: Survey – Ressecção pulmonar em doenças infecciosas**

*Survey:*

- 1- A maior parte das ressecções pulmonares (segmentectomia anatômicas, lobectomias, pneumonectomias) por doença infecciosa que você realiza são em instituição:
  - A) Pública assistencial.
  - B) Pública acadêmica.
  - C) Privada assistencial.
  - D) Privada acadêmica.
  - E) Não realizo ressecções pulmonares por doença infecciosa.
  
- 2- Qual foi o número aproximado de ressecções pulmonares (segmentectomias anatômicas, lobectomias, pneumonectomias) por doença infecciosa que você realizou nos últimos 12 meses?  
Resp: numérica
  
- 3- Enumere conforme ordem de importância (número de casos encaminhados), a origem dos pacientes com doença pulmonar infecciosa que você atende para avaliação de tratamento cirúrgico:  
(Possibilidades de resposta de 1 a 6 para cada item, não permitindo respostas duplicadas)
  - a) Pneumologia
  - b) Infectologia
  - c) Clínica médica
  - d) Unidade básica de saúde (sem especialidade especificada)
  - e) Demanda espontânea do paciente sem avaliação médica prévia
  - f) Outras
  
- 4- O serviço em que realiza maior parte das suas ressecções por doença infecciosa pulmonar é considerado centro de referência para esse tratamento na sua região)?
  - a) Sim
  - b) Não
  
- 5- Quais dos recursos estruturais abaixo você dispõe e utiliza regularmente para atendimento aos pacientes com doença infecciosa pulmonar:  
(Seleção múltipla de respostas)
  - a) Leito de isolamento respiratório em enfermaria
  - b) Leito de isolamento respiratório em UTI
  - c) Sala cirúrgica específica para pacientes bacilíferos
  - d) Centro de endoscopia respiratória
  - e) Ambulatório específico para atendimento de doenças infecciosas pulmonares
  - f) Serviço de retaguarda para internação prolongada de doentes
  - g) Serviço ambulatorial de nutrição
  - h) Serviço ambulatorial de fisioterapia

- 6- Quais dos recursos abaixo você dispõe e faz uso regular durante o planejamento, preparo e recuperação dos pacientes com doença pulmonar infecciosa:  
(Seleção múltipla de respostas)
- a) Reunião multidisciplinar regular direcionada exclusivamente para discussão dos casos de doença infecciosa pulmonar.
  - b) Protocolos de otimização nutricional perioperatórios
  - c) Protocolos de ERAS
  - d) Fisioterapia motora e respiratório pós-operatória
  - e) Grupo de cuidados com estomas e feridas operatórias
  - f) Grupo de tratamento de dor crônica e/ou aguda pós-operatória

NO tocante a indicação você faz uso de algum protocolo : qual?

- 7- Na avaliação pré-operatória das ressecções pulmonares maiores (lobectomias e pneumonectomias) por doença infecciosa, você realiza obrigatoriamente (de forma protocolar) qual(is) dos exames abaixo:  
(Seleção múltipla de respostas)
- a) Prova de função pulmonar (espirometria)
  - b) Medida da capacidade de difusão pulmonar para monóxido de carbono (DLCO)
  - c) Ergoespirometria
  - d) Ecocardiograma transtorácico
  - e) Teste de caminhada de 6 minutos
  - f) Avaliação de risco cardiovascular
  - g) Não realizo nenhum exame pré-operatório de maneira obrigatória
- 8- Seu serviço dispõe (ou tem fácil acesso) e realiza de rotina teste de sensibilidade a drogas de primeira e segunda linha (DST) ou testes rápidos moleculares endossados pela WHO (por ex.: geneXpert) para os pacientes com tuberculose?
- a) Sim
  - b) Não
- 9- Enumere quantos casos por cada uma das apresentações clínicas apontadas você realizou ressecção pulmonar nos últimos 12 meses:
- a) Hemoptise
  - b) Infecção de repetição
  - c) Tuberculose resistente (o intuito primário foi controlar a infecção, inclui M-DR ou X-DR)
  - d) Como adjuvante no tratamento de micobactéria não tuberculosa
  - e) Controle de sintomas gerais como tosse e expectoração (com impacto na qualidade de vida)
- \* Resp. possíveis: 0 - 1 - 2 - 3 - 4 - 5 - 6 - 7 - 8 - 9 - 10 - mais que 10
- 10- Quanto a etiologia, enumere quantos casos por cada uma das etiologias apontadas você realizou ressecção pulmonar nos últimos 12 meses:
- a) Sequela de tuberculose (inclui bronquiectasia por tuberculose com e sem arpergiloma)
  - b) Tuberculose ativa (inclui M-DR ou X-DR)
  - c) Micobactéria não tuberculosa
  - d) Bronquiectasia não fibrose cística e não pós tuberculose
  - e) Outras
- \* Resp. possíveis: 0 - 1 - 2 - 3 - 4 - 5 - 6 - 7 - 8 - 9 - 10 - mais que 10

- 11- Quantos casos operados tinham associado aspergiloma ou aspergilose cavitária crônica?  
0 - 1 - 2 - 3 - 4 - 5 - 6 - 7 - 8 - 9 - 10 - mais que 10
- 12- Quais dos recursos tecnológicos abaixo você dispõe e faz uso regular durante ressecções pulmonares para doença pulmonar infecciosa, no serviço em que realiza a maior parte desses casos:  
(Seleção múltipla de respostas)  
a) Videotoracoscopia  
b) Robótica  
c) Dispositivo de sutura mecânica (grampeador) para tratamento de coto brônquico  
d) Broncoscopia em sala operatória  
e) Coagulação por plasma de argônio
- 13- No que diz respeito ao tratamento de cavidades residuais consideradas volumosas após ressecções pulmonares complexas por doença infecciosa (lobectomias, bilobectomias ou lobectomia com segmentectomia associada). Ainda no intraoperatório da ressecção, você realiza alguma das medidas abaixo:  
(Seleção múltipla de respostas)  
a) Preenchimento da cavidade com retalho muscular.  
b) Toracoplastia seletiva  
c) Bloqueio de nervo frênico  
d) Secção de nervo frênico  
e) Pneumoperitônio  
f) Apenas drenagem torácica e aguardo evolução.
- 14- Seu serviço realiza tratamento cirúrgico e/ou endoscópico para pacientes com lesões pulmonares cavitárias que não possuem condições de ressecção pulmonar e/ou possuem doença pulmonar extensa?  
a) Colapsoterapia endoscópica  
b) Toracoplastia e mioplastia  
c) Cavernostomia  
d) Outros  
e) Todos anteriores
- 15- Aproximadamente quantos casos de empiema pós-ressecção pulmonar você recebeu nos últimos 12 meses? Considere apenas as ressecções realizadas no serviço em que opera a maior parte desses casos.  
\* Resp. possíveis: 0 - 1 - 2 - 3 - 4 - 5 - 6 - 7 - 8 - 9 - 10 - mais que 10
- 16- Quantos desses casos tinham fístula de coto associada?  
\* Resp. possíveis: 0 - 1 - 2 - 3 - 4 - 5 - 6 - 7 - 8 - 9 - 10 - mais que 10
- 17- Seu serviço dispõe e faz uso de procedimentos endoscópicos para tratamento de fístula de coto brônquico pós ressecção?  
a) Sim, dispõe e faço uso.  
b) Sim, dispõe mas não faço uso.  
c) Não dispõe por isso não uso.  
d) Não dispõe, mas se houvesse não usaria.

- 18- Levando em conta as orientações estabelecidas pela OMS no consenso de 2014 sobre o papel da cirurgia no tratamento da tuberculose pulmonar (The role of surgery in the treatment of pulmonary TB and multidrug- and extensively drug-resistant TB - World Health Organization 2014), você se considera satisfeito com o tratamento oferecido pelo seu serviço aos pacientes com tuberculose pulmonar?
- Não conheço o consenso em questão.
  - Conheço o consenso, porém não o utilizo como parâmetro na minha assistência.
  - Me sinto satisfeito
  - Me sinto insatisfeito
- Para a resposta de não realizar ressecções por doença infecciosa:
    - Quais os motivos que melhor explicam você não realizar ressecções pulmonares por doença infecciosa em seu serviço?
      - Não é o foco da minha instituição
      - Pneumologia não encaminha
      - Infectologia não encaminha
      - Recebo os casos, mas me falta infraestrutura para tratá-los.

### English version: Survey – Lung resection in infectious diseases

#### Survey:

- Most lung resections (anatomical segmentectomy, lobectomy, pneumonectomy) due to infectious disease that you perform are in institutions:
  - Public assistance.
  - Academic public.
  - Private assistance.
  - Private academic.
  - I do not perform pulmonary resections due to infectious disease.
- What was the approximate number of pulmonary resections (anatomical segmentectomies, lobectomies, pneumonectomies) due to infectious disease that you performed in the last 12 months?  
Answer: numerical
- List according to order of importance (number of cases referred), the origin of the patients with infectious lung disease that you see for evaluation of surgical treatment:  
(Possibility of answers from 1 to 6 for each item, not allowing duplicate answers)
  - Pulmonology
  - Infectology
  - medical clinic
  - Basic health unit (no specialty specified)
  - Spontaneous demand from the patient without prior medical evaluation
  - Other
- Is the service where you perform most of your resections for infectious lung disease considered a reference center for this treatment in your region)?
  - yes
  - no

- 5- Which of the structural resources below do you have and use regularly to care for patients with infectious lung disease:  
(Multiple selection of answers)
- a) Respiratory isolation bed in the ward
  - b) Respiratory isolation bed in the ICU
  - c) Specific operating room for bacilliferous patients
  - d) Respiratory endoscopy center
  - e) Specific clinic for treating pulmonary infectious diseases
  - f) Back-up service for prolonged hospitalization of patients
  - g) Outpatient nutrition service
  - h) Outpatient physiotherapy service
- 6- Which of the following resources do you have and use regularly during the planning, preparation and recovery of patients with infectious lung disease:  
(Multiple selection of answers)
- a) Regular multidisciplinary meeting aimed exclusively at discussing cases of infectious lung disease.
  - b) Perioperative nutritional optimization protocols
  - c) ERAS protocols
  - d) Postoperative motor and respiratory physiotherapy
  - e) Group for care with stoma and surgical wounds
  - f) Chronic and/or acute postoperative pain treatment group
- 7- In the preoperative evaluation of major lung resections (lobectomies and pneumonectomy) due to infectious disease, you must perform (in a protocol manner) which of the following exams:  
(Multiple selection of answers)
- a) Pulmonary function test (spirometry)
  - b) Measurement of lung diffusing capacity for carbon monoxide (DLCO)
  - c) Ergospirometry
  - d) Transthoracic echocardiogram
  - e) 6-minute walk test
  - f) Assessment of cardiovascular risk
  - g) I do not carry out any mandatory preoperative examination
- 8- Does your service have (or have easy access to) and routinely perform first- and second-line drug (STD) sensitivity testing or WHO-endorsed rapid molecular tests (eg, geneXpert) for patients with tuberculosis?
- a) yes
  - b) no
- 9- List how many cases for each of the clinical presentations indicated you underwent lung resection in the last 12 months:
- a) Hemoptysis
  - b) Recurrent infection
  - c) Resistant tuberculosis (primary intent was to control infection, includes M-DR or X-DR)
  - d) As an adjuvant in the treatment of nontuberculous mycobacteria
  - e) Control of general symptoms such as cough and expectoration (with an impact on quality of life)
- \* Answer possible: 0 - 1 - 2 - 3 - 4 - 5 - 6 - 7 - 8 - 9 - 10 - more than 10

- 10- Regarding the etiology, list how many cases for each of the etiologies indicated you underwent lung resection in the last 12 months:
- a) Sequelae of tuberculosis (includes bronchiectasis due to tuberculosis with and without aspergilloma)
  - b) Active tuberculosis (includes M-DR or X-DR)
  - c) Nontuberculous mycobacteria
  - d) Non-cystic fibrosis and non-post tuberculosis bronchiectasis and others
- \* Answer possible: 0 - 1 - 2 - 3 - 4 - 5 - 6 - 7 - 8 - 9 - 10 - more than 10
- 11- How many operated cases had associated aspergilloma or chronic cavitary aspergillosis?
- 0 - 1 - 2 - 3 - 4 - 5 - 6 - 7 - 8 - 9 - 10 - more than 10
- 12- Which of the following technological resources do you have and use regularly during lung resections for infectious lung disease, in the service where most of these cases are performed:
- (Multiple selection of answers)
- a) Videothoracoscopy
  - b) Robotics
  - c) Mechanical suture device (stapler) for treatment of bronchial stump
  - d) Bronchoscopy in the operating room
  - e) Argon plasma coagulation
- 13- With regard to the treatment of residual cavities considered voluminous after complex pulmonary resections due to infectious disease (lobectomy, bilobectomy or lobectomy with associated segmentectomy). Still in the intraoperative period of the resection, you perform some of the measures below:
- (Multiple selection of answers)
- a) Filling of the cavity with muscle flap.
  - b) Selective thoracoplasty
  - c) Phrenic nerve block
  - d) Phrenic nerve section
  - i) Pneumoperitoneum
  - f) Only thoracic drainage and waiting for evolution.
- 14- Does your service perform surgical and/or endoscopic treatment for patients with cavitary lung lesions who do not have lung resection conditions and/or have extensive lung disease?
- a) Endoscopic collapse therapy
  - b) Thoracoplasty and myoplasty
  - c) Cavernostomy
  - d) Other
  - e) All previous
- 15- Approximately how many cases of empyema after pulmonary resection have you received in the last 12 months? Consider only the resections performed in the service where most of these cases operate.
- \* Answer possible: 0 - 1 - 2 - 3 - 4 - 5 - 6 - 7 - 8 - 9 - 10 - more than 10
- 16- How many of these cases had a fistula associated with the stump?
- \* Answer possible: 0 - 1 - 2 - 3 - 4 - 5 - 6 - 7 - 8 - 9 - 10 - more than 10

- 17- Does your service have and use endoscopic procedures for the treatment of bronchial stump fistula after resection?
- Yes, it is available and I use it.
  - Yes, it is available but I do not use it.
  - It doesn't have it so I don't use it.
  - Does not have it, but if it did, I would not use it.
- 18- Taking into account the guidelines established by the WHO in the 2014 consensus on the role of surgery in the treatment of pulmonary tuberculosis (The role of surgery in the treatment of pulmonary TB and multidrug- and extensively drug-resistant TB - World Health Organization 2014) , do you consider yourself satisfied with the treatment offered by your service to patients with pulmonary tuberculosis?
- I do not know the consensus in question.
  - I know the consensus, but I do not use it as a parameter in my assistance.
  - I feel satisfied
  - I feel dissatisfied
- For the response of not performing resections due to infectious disease:
    - 3) What are the reasons that best explain why you do not perform lung resections due to infectious disease in your service?
      - It is not the focus of my institution
      - Pulmonology does not refer
      - Infectology does not refer
      - I receive the cases, but I lack the infrastructure to treat them.
